# Supplementary material for: Photo-crosslinking of clinically relevant kinases using H89-derived photo-affinity probes
Source: Royal Society of Chemistry journal article supplement (doi:10.1039/c6mb00257a), 2016-04-19
Supplement: c6mb00257a1.pdf [file c6mb00257a1.pdf]

SUPPORTING INFORMATION

## Photo-crosslinking of clinically relevant kinases using H89-derived photo-affinity probes

Sara C. Stolze,<sup>a†</sup> Nora Liu,<sup>a†</sup> Ruud H. Wijdeven,<sup>b</sup> Adriaan W. Tuin,<sup>a</sup> Adrianus M. C. H. van den Nieuwendijk,<sup>a</sup> Bogdan I. Florea,<sup>a</sup> Mario van der Stelt,<sup>a</sup> Gijsbert A. van der Marel,<sup>a</sup> Jacques J. Neefjes<sup>b</sup> and Herman S. Overkleeft<sup>\*a</sup>

<sup>a</sup>. Leiden Institute of Chemistry, Leiden University, Einsteinweg 55, 2300 RA Leiden, The Netherlands. E-mail: h.s.overkleeft@chem.leidenuniv.nl.

<sup>b</sup>. Division of Cell Biology, The Netherlands Cancer Institute, Plesmanlaan 121, 1066 CX Amsterdam, The Netherlands.

† These authors contributed equally to this work.

### Table of contents

Kinomescan activities of probe **3** and **4**

Dose dependency curves for probe **3** and **4**

<sup>1</sup>H and <sup>13</sup>C NMR spectra of all novel compounds

**Table S1:** Activities of probe **3** and **4** against a panel of kinases.<sup>1</sup>Activities are given as % residual kinase activity at 10  $\mu$ M probe.

| Kinase           | 3   | 4   | Kinase        | 3   | 4   |
|------------------|-----|-----|---------------|-----|-----|
| PKAc- $\alpha$   | 1.5 | 3.4 | TAOK1         | 72  | 52  |
| AKT1             | 2.6 | 18  | MEK2          | 73  | 72  |
| ROCK2            | 3   | 1.7 | FAK           | 74  | 100 |
| AKT3             | 3.4 | 25  | VEGFR2        | 75  | 85  |
| PRKCH            | 5   | 2.8 | CLK2          | 76  | 72  |
| PRKCE            | 20  | 10  | JNK1          | 78  | 82  |
| PRKCD            | 23  | 14  | TYK2          | 78  | 97  |
| SNARK            | 23  | 24  | TRKA          | 79  | 82  |
| SGK3             | 31  | 32  | AURKB         | 80  | 79  |
| CDK11            | 35  | 78  | GSK3B         | 80  | 74  |
| PRKCI            | 35  | 35  | PCTK1         | 80  | 84  |
| CSNK1D           | 39  | 38  | JNK3          | 81  | 89  |
| MARK3            | 40  | 53  | FGFR3         | 82  | 84  |
| CDK7             | 43  | 48  | PIK3CG        | 82  | 78  |
| DYRK1B           | 45  | 74  | PLK1          | 82  | 83  |
| ALK              | 50  | 62  | YANK3         | 82  | 88  |
| FLT3             | 50  | 60  | MAPKAPK2      | 83  | 95  |
| MLCK             | 50  | 76  | PIM1          | 83  | 81  |
| CSF1R            | 51  | 96  | ULK2          | 83  | 65  |
| TSSK1B           | 53  | 56  | ZAP70         | 83  | 94  |
| AXL              | 54  | 74  | DYRK1A        | 84  | 85  |
| CHEK1            | 56  | 72  | ERBB4         | 84  | 90  |
| SRPK3            | 57  | 86  | ERN1          | 85  | 57  |
| CDK9             | 58  | 70  | LKB1          | 85  | 94  |
| PDGFRB           | 58  | 57  | PAK4          | 86  | 98  |
| PIP5K1A          | 58  | 37  | ACVR1B        | 87  | 100 |
| PDPK1            | 59  | 69  | p38-beta      | 87  | 100 |
| PLK4             | 59  | 57  | CSNK1G3       | 89  | 91  |
| RET              | 59  | 76  | ERBB2         | 89  | 64  |
| FGFR2            | 60  | 67  | INSR          | 89  | 81  |
| KIT              | 61  | 70  | PAK2          | 89  | 96  |
| AMPK- $\alpha$ 2 | 63  | 83  | TGFBR1        | 89  | 88  |
| DCAMKL1          | 63  | 86  | PIM3          | 90  | 94  |
| PRKCC            | 63  | 46  | AURKA         | 91  | 69  |
| EPHA2            | 65  | 66  | JAK3          | 91  | 84  |
| MAP3K4           | 65  | 68  | PDGFRA        | 91  | 98  |
| AKT2             | 66  | 91  | RAF1          | 91  | 78  |
| CDK2             | 66  | 92  | BMPR2         | 92  | 89  |
| CDK3             | 66  | 78  | PIK3CA        | 93  | 94  |
| ABL1-p           | 67  | 81  | CSNK1G2       | 94  | 80  |
| JAK2             | 67  | 90  | MEK1          | 95  | 83  |
| MET              | 67  | 55  | PAK1          | 95  | 95  |
| RSK2             | 67  | 72  | BTK           | 96  | 92  |
| TIE2             | 68  | 86  | p38- $\alpha$ | 96  | 94  |
| ERK1             | 69  | 70  | HIPK2         | 97  | 95  |
| JNK2             | 69  | 86  | EGFR          | 98  | 100 |
| PLK3             | 69  | 73  | PIK3C2B       | 98  | 94  |
| PIM2             | 70  | 62  | IKK-beta      | 99  | 80  |
| SRC              | 70  | 70  | MKNK1         | 99  | 92  |
| ADCK3            | 71  | 96  | PIK4CB        | 99  | 97  |
| MKNK2            | 71  | 71  | BRAF          | 100 | 93  |
| MST2             | 71  | 73  | IKK-alpha     | 100 | 86  |
| FLT1             | 72  | 69  | MTOR          | 100 | 100 |
| IGF1R            | 72  | 63  | MYO3A         | 100 | 100 |
| MLK1             | 72  | 69  | RIOK2         | 100 | 88  |
| MUSK             | 72  | 77  |               |     |     |

<sup>1</sup> M. W. Karaman, S. Herrgard, D. K. Treiber, P. Gallant, C. E. Atteridge, B. T. Campbell, K. W. Chan, P. Ciceri, M. J. Davis, P. T. Edeen, R. Faraoni, M. Floyd, J. P. Hunt, D. J. Lockhart, Z. V. Milanov, M. J. Morrison, G. Pallares, H. K. Patel, S. Pritchard, L. M. Wodicka and P. P. Zarrinkar, *Nat. Biotech.*, 2008, **26**, 127-132.

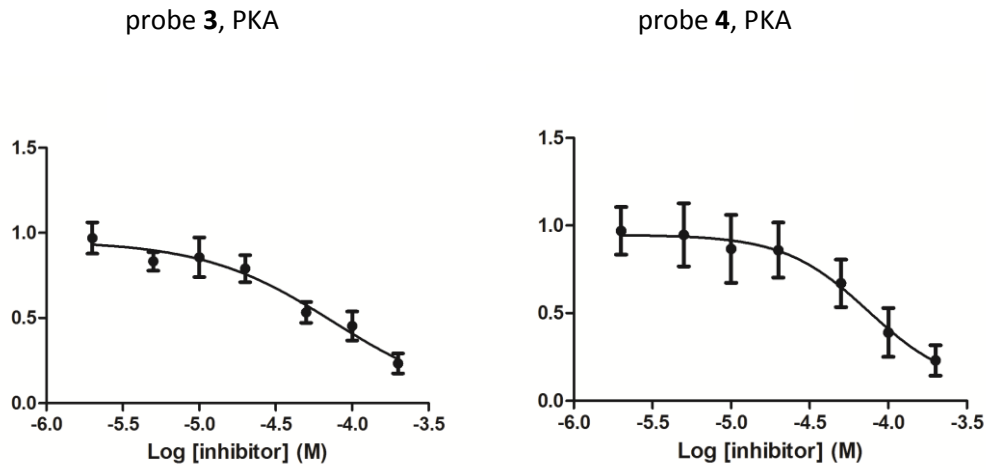

**Fig.S1:** Dose-dependent activity of PKA determined by FRET-based assay for probes 3 and 4.

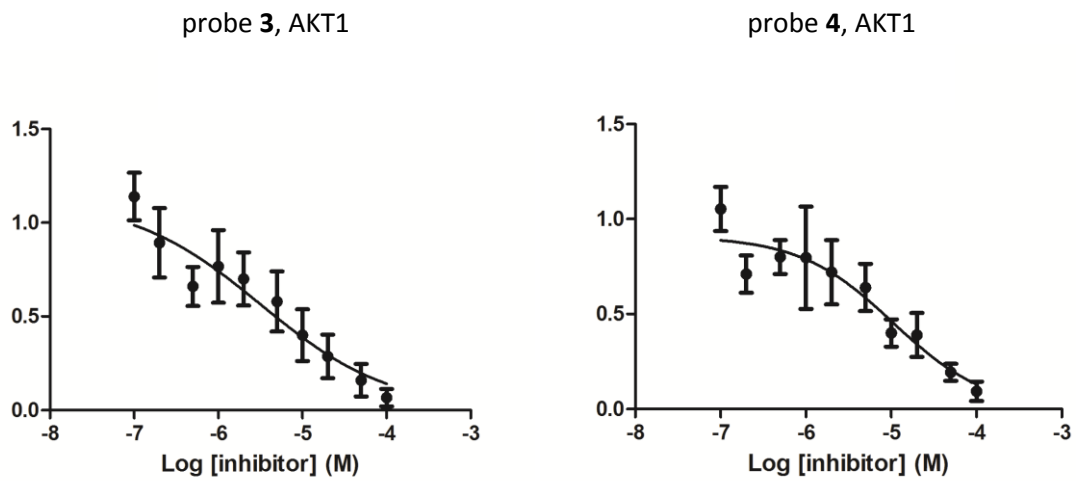

**Fig.S2:** Dose-dependent activity of AKT1 determined by FRET-based assay for probes 3 and 4.

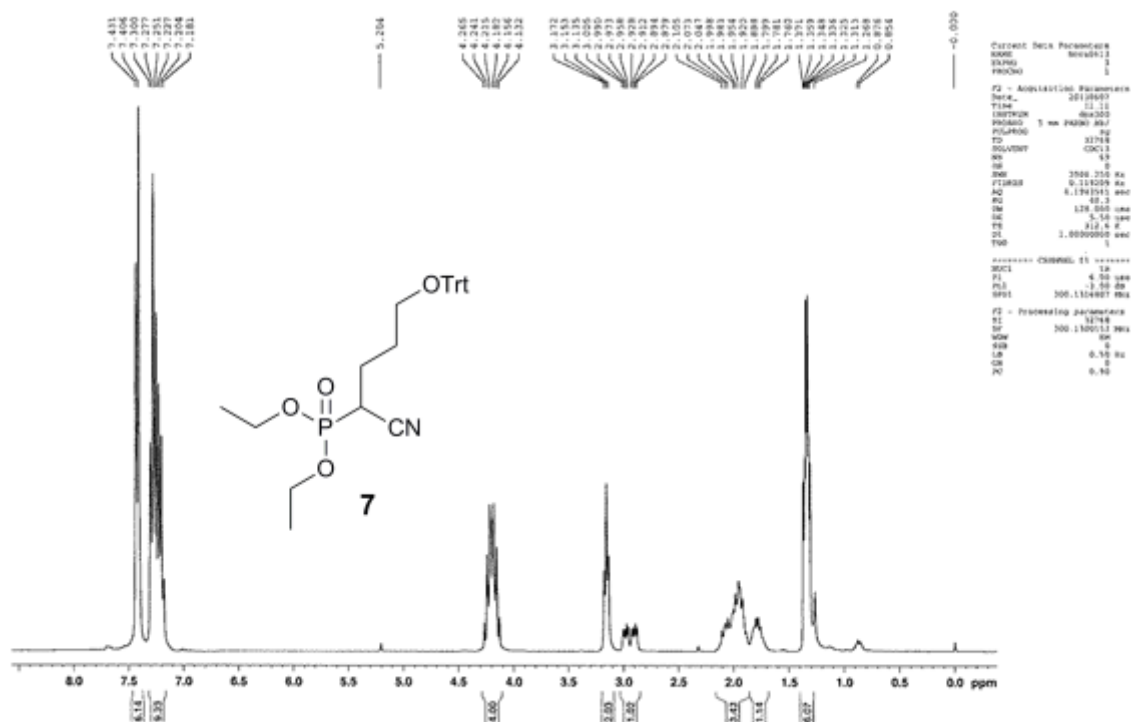

Fig.S3: <sup>1</sup>H NMR (400 MHz, CDCl<sub>3</sub>, Me<sub>4</sub>Si)for (Diethyl (1-cyano-4-(trityloxy)butyl)phosphonate (7)).

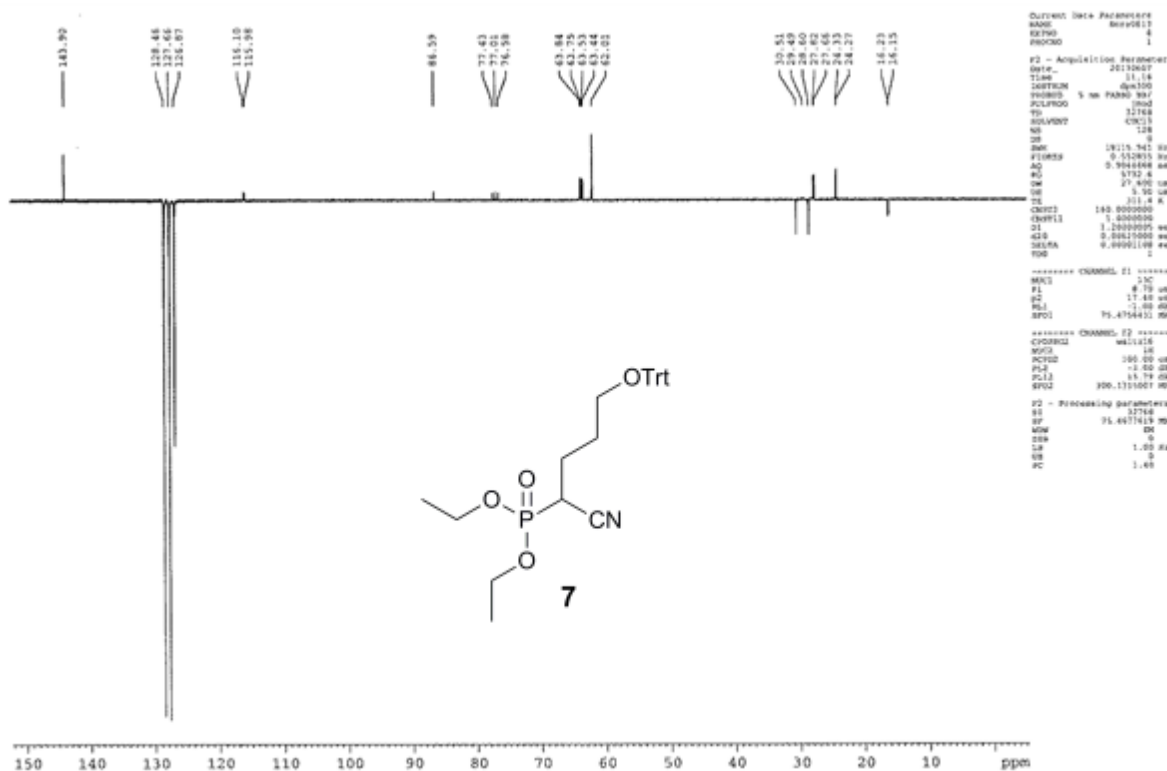

Fig.S4: <sup>13</sup>C NMR (101 MHz, CDCl<sub>3</sub>)for (Diethyl (1-cyano-4-(trityloxy)butyl)phosphonate (7)).

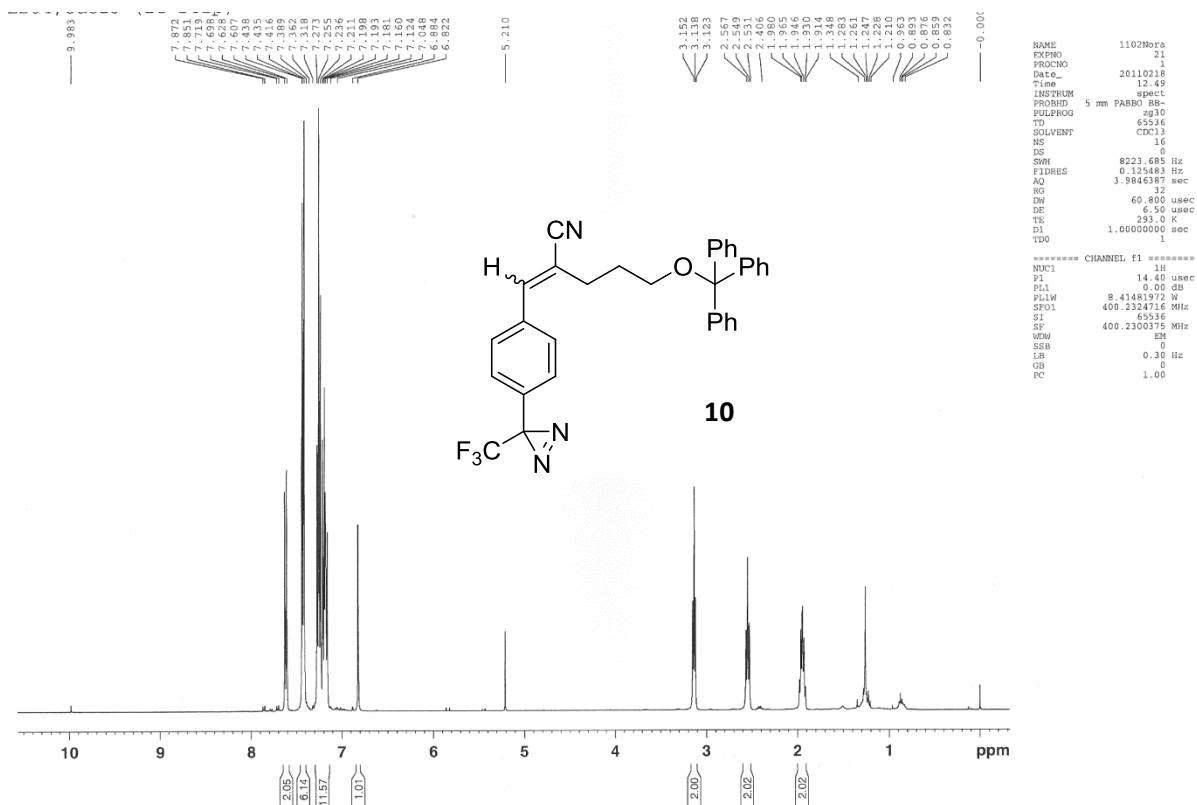

**Fig.S5:** <sup>1</sup>H NMR (400 MHz, CDCl<sub>3</sub>, Me<sub>4</sub>Si) for (E/Z)-2-(4-(3-(trifluoromethyl)-3H-diazirin-3-yl)-benzylidene)-5-(trityloxy)pentanenitrile (**10**).

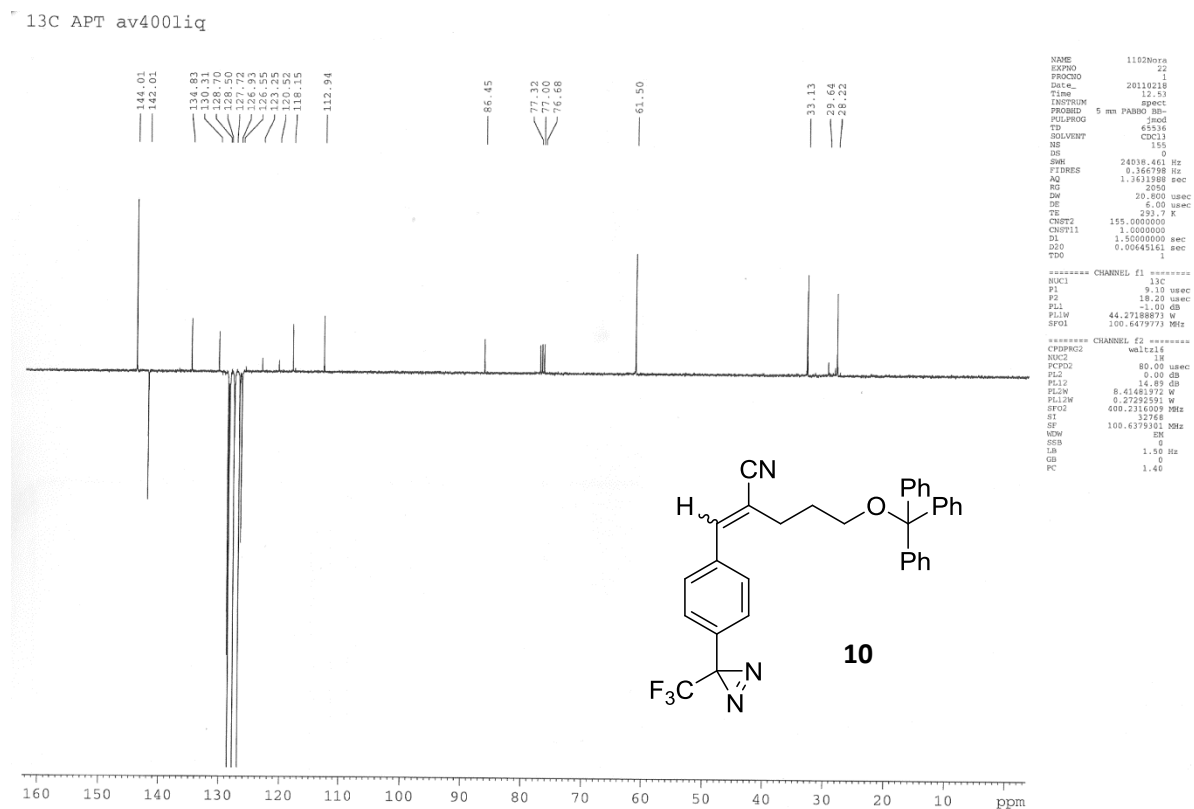

**Fig.S6:** <sup>13</sup>C NMR (101 MHz, CDCl<sub>3</sub>) for (E/Z)-2-(4-(3-(trifluoromethyl)-3H-diazirin-3-yl)-benzylidene)-5-(trityloxy)pentanenitrile (**10**).

biosyn1Hfast CDCl3 /opt/DATA nmrafd 8

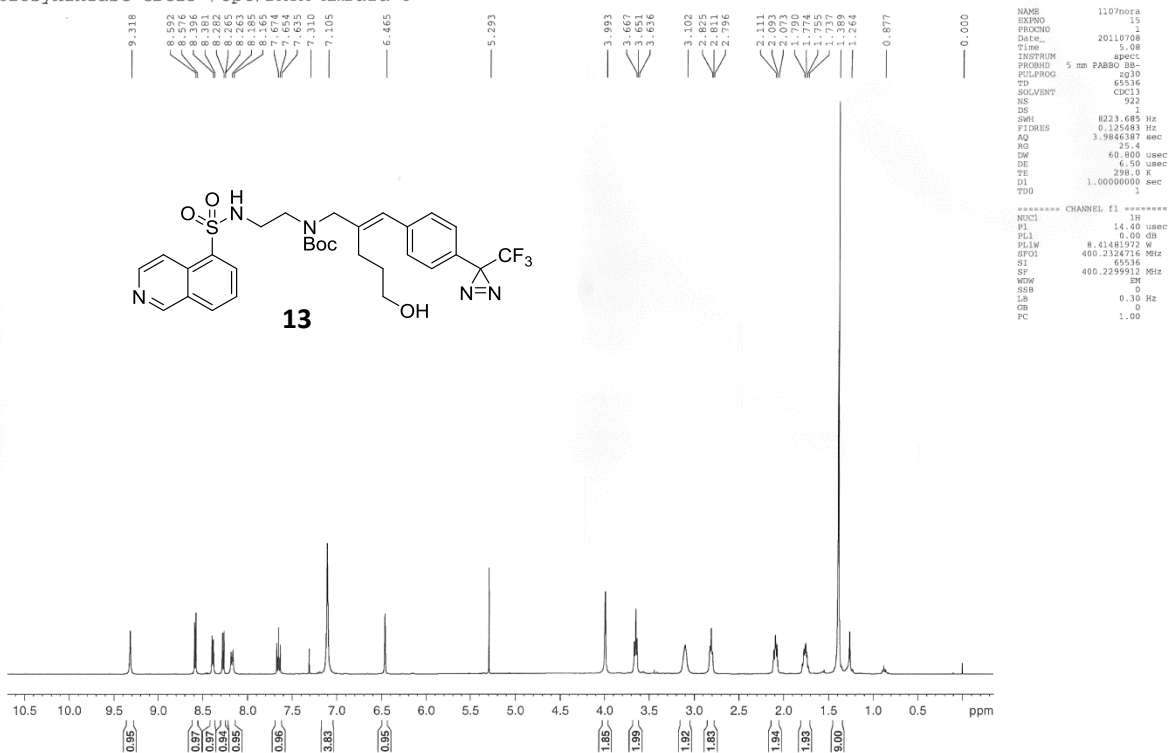

**Fig.S7:**  $^1\text{H}$  NMR (400 MHz,  $\text{CDCl}_3$ ,  $\text{Me}_4\text{Si}$ ) for tert-butyl(*E*)-(5-hydroxy-2-(4-(3-(trifluoromethyl)-3*H*-diazirin-3-yl)benzylidene)pentyl)(2-(isoquinoline-5-sulfonamido)ethyl)-carbamate (**13**).

biosynAPTfast CDCl3 /opt/DATA nmrafd 5

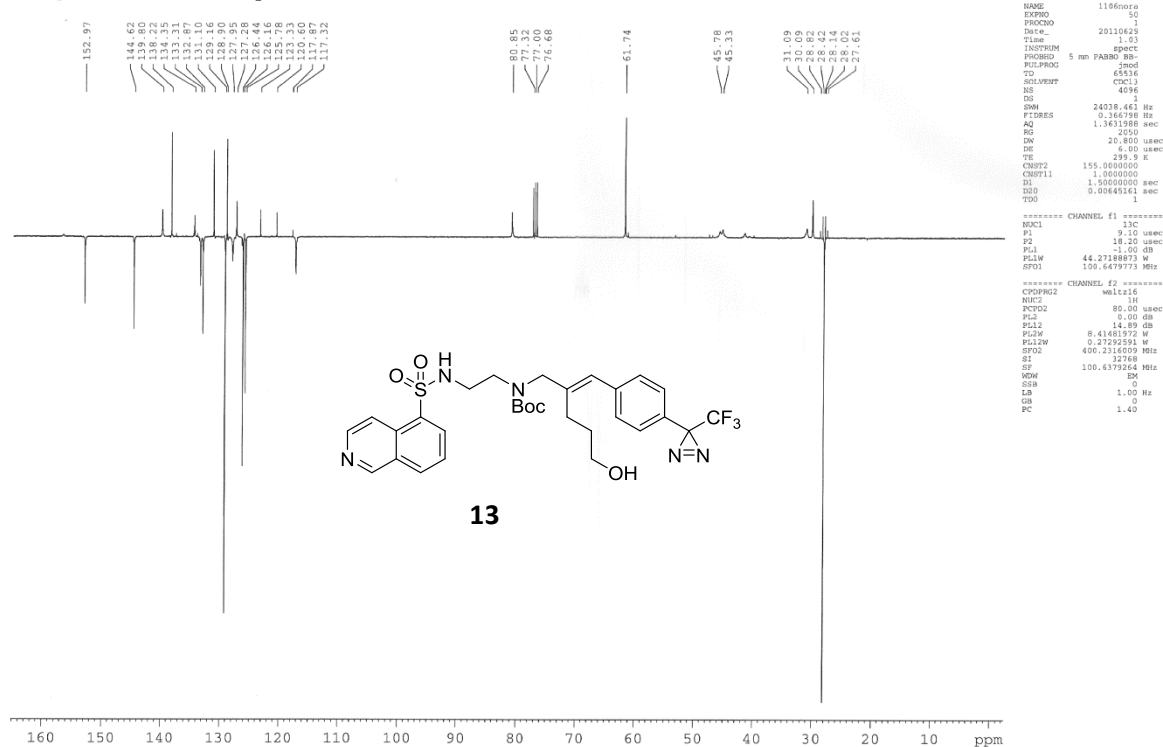

**Fig.S8:**  $^{13}\text{C}$  NMR (101 MHz,  $\text{CDCl}_3$ ) for tert-butyl(*E*)-(5-hydroxy-2-(4-(3-(trifluoromethyl)-3*H*-diazirin-3-yl)benzylidene)pentyl)(2-(isoquinoline-5-sulfonamido)ethyl)-carbamate (**13**).

biosyn1Hfast CDC13 /opt/DATA nmrafd 2

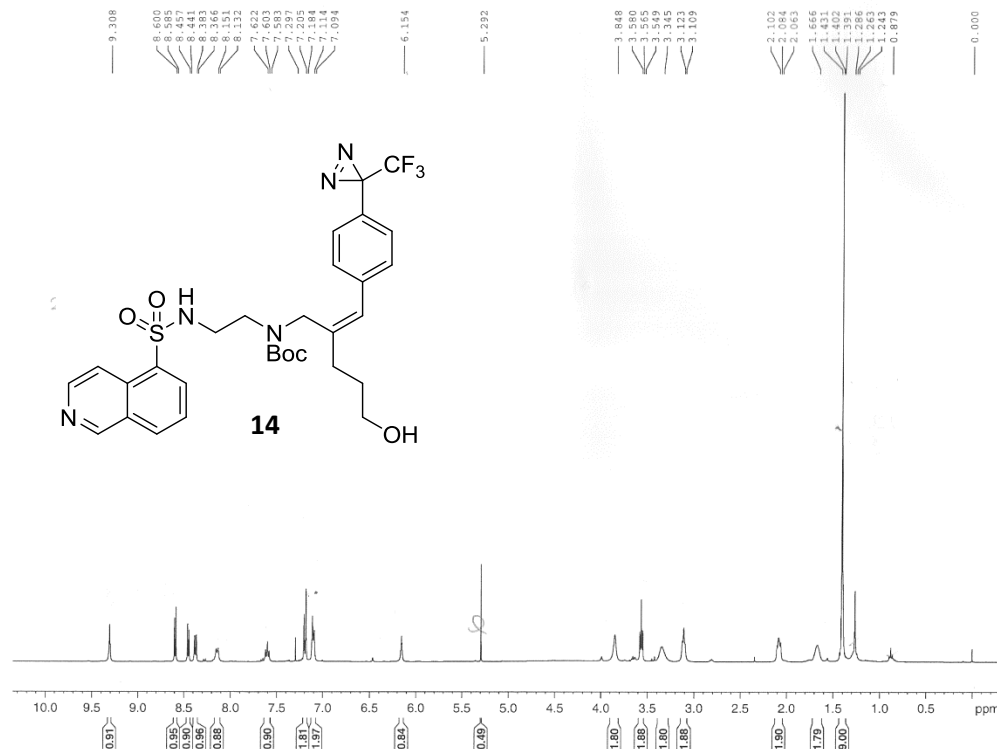

```
NAME      1107nora
EXPNO    37
PROCNO   1
Date_    20110712
Time     21:15
INSTRUM  spect
PROBHD   5 mm PABBO BB-
PULPROG  zg30
TD        65536
SOLVENT  CDCl3
NS        512
DS        1
SWH       8223.685 Hz
FIDRES   0.125483 Hz
AQ        3.9646387 sec
RG         28.0
NUC1      13C
NUC2      13C
DE        6.50 usec
TE        298.4 K
D1        1.0000000 sec
TD0       1
===== CHANNEL f1 =====
NUC1      13C
P1        14.40 usec
PL1       0.00 dB
PL12      8.41481972 W
SFO1      400.2329716 MHz
SI        65536
SF        400.2299969 MHz
WDW       EM
SSB       0
GB        0.30 Hz
PC        1.00
```

**Fig.S9:** <sup>1</sup>H NMR (400 MHz, CDCl<sub>3</sub>, Me<sub>4</sub>Si) for tert-butyl(Z)-(5-hydroxy-2-(4-(3-(trifluoromethyl)-3H-diazirin-3-yl)benzylidene)pentyl)(2-(isoquinoline-5-sulfonamido)ethyl)-carbamate (**14**)

biosynAPTfast CDC13 /opt/DATA nmrafd 2

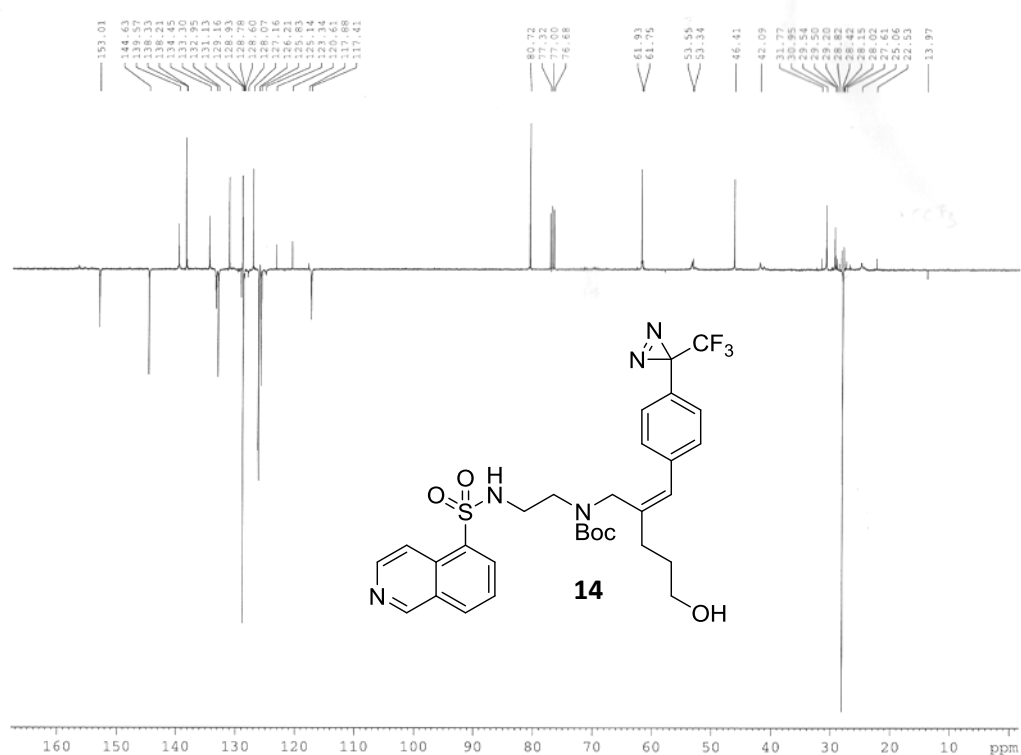

```
NAME      1107nora
EXPNO    38
PROCNO   1
Date_    20110712
Time     22:58
INSTRUM  spect
PROBHD   5 mm PABBO BB-
PULPROG  zgpg30
TD        65536
SOLVENT  CDCl3
NS        2048
DS        1
SWH       24038.461 Hz
FIDRES   0.364798 Hz
AQ        1.3631888 sec
RG         205
NUC1      13C
NUC2      13C
DE        20.800 usec
TE        298.0 K
D1        1.0000000 sec
D2        1.0000000 sec
D3        0.60645161 sec
TD0       1
===== CHANNEL f1 =====
NUC1      13C
P1        9.11 usec
PL1       18.20 usec
PL12      0.00 dB
PL13      0.00 dB
PL14      44.27188871 W
SFO1      100.4479773 MHz
===== CHANNEL f2 =====
PROBHD   5 mm PABBO BB-
PULPROG  zgpg30
TD        65536
SOLVENT  CDCl3
NS        2048
DS        1
SWH       24038.461 Hz
FIDRES   0.364798 Hz
AQ        1.3631888 sec
RG         205
NUC1      13C
NUC2      13C
DE        20.800 usec
TE        298.0 K
D1        1.0000000 sec
D2        1.0000000 sec
D3        0.60645161 sec
TD0       1
```

**Fig.S10:** <sup>13</sup>C NMR (101 MHz, CDCl<sub>3</sub>) for tert-butyl(Z)-(5-hydroxy-2-(4-(3-(trifluoromethyl)-3H-diazirin-3-yl)benzylidene)pentyl)(2-(isoquinoline-5-sulfonamido)ethyl)-carbamate (**14**).

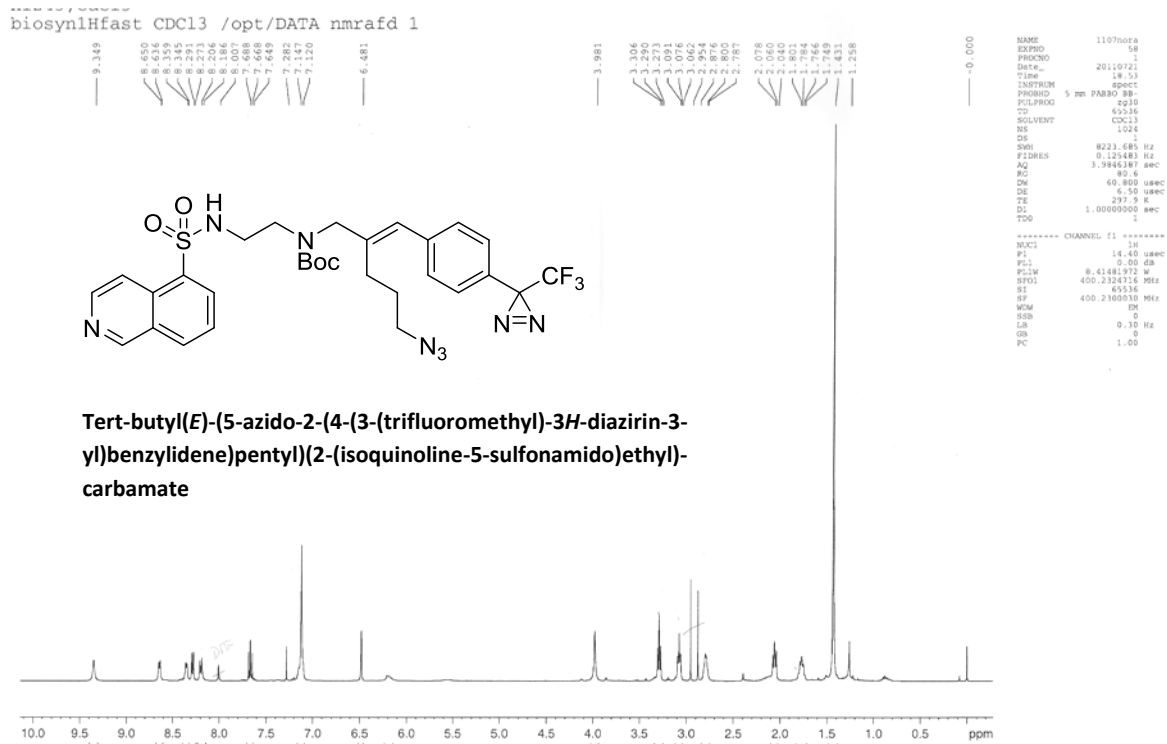

**Fig.S11:** <sup>1</sup>H NMR (400 MHz, CDCl<sub>3</sub>, Me<sub>4</sub>Si) for tert-butyl(*E*)-(5-azido-2-(4-(3-(trifluoromethyl)-3*H*-diazirin-3-yl)benzylidene)pentyl)(2-(isoquinoline-5-sulfonamido)ethyl)-carbamate.

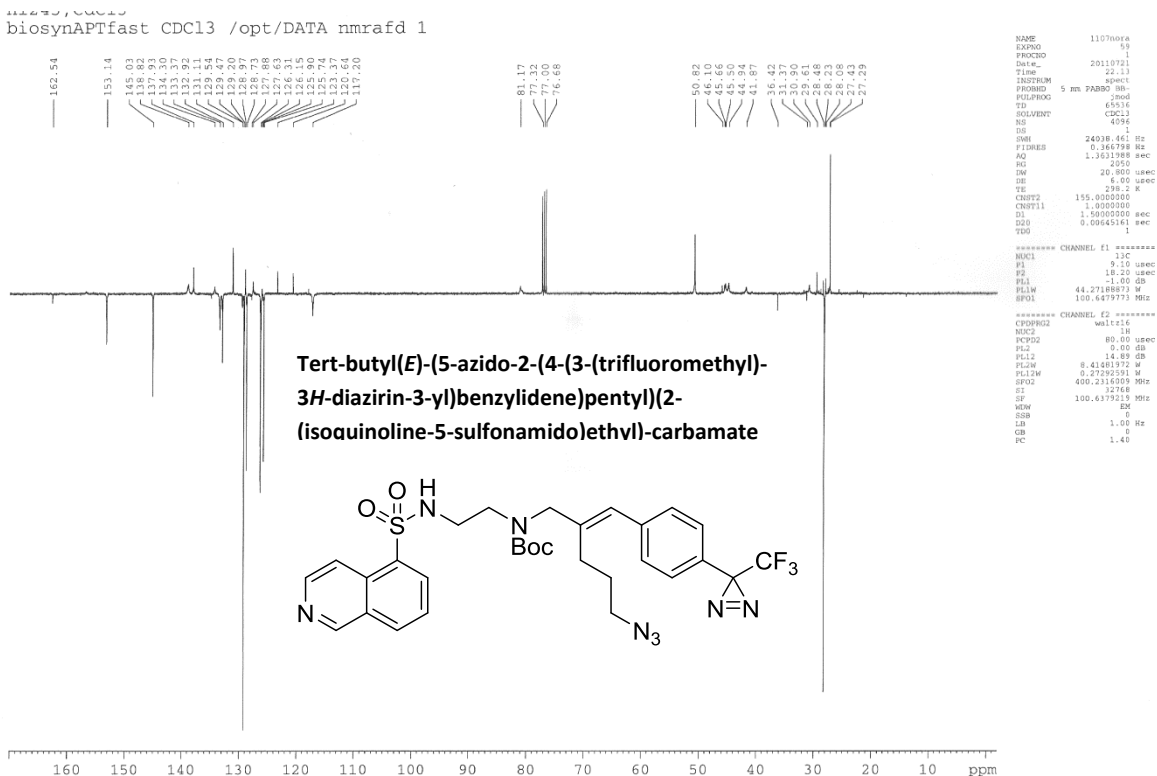

**Fig.S12:** <sup>13</sup>C NMR (101 MHz, CDCl<sub>3</sub>) for tert-butyl(*E*)-(5-azido-2-(4-(3-(trifluoromethyl)-3*H*-diazirin-3-yl)benzylidene)pentyl)(2-(isoquinoline-5-sulfonamido)ethyl)-carbamate.



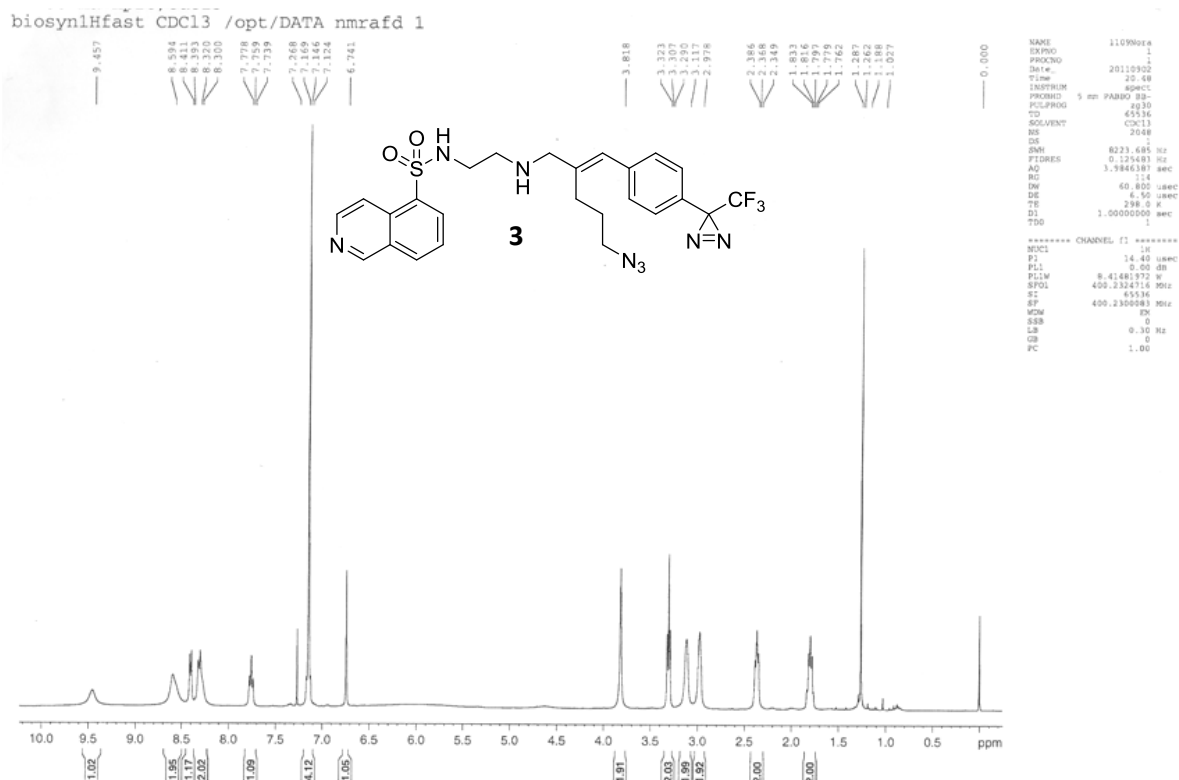

**Fig.S13:**  $^1\text{H}$  NMR (400 MHz,  $\text{CDCl}_3$ ,  $\text{Me}_4\text{Si}$ ) for (*E*)-*N*-(2-((5-azido-2-(4-(3-(trifluoromethyl)-3*H*-diazirin-3-yl)benzylidene)pentyl)amino)ethyl)isoquinoline-5-sulfonamide (**3**).

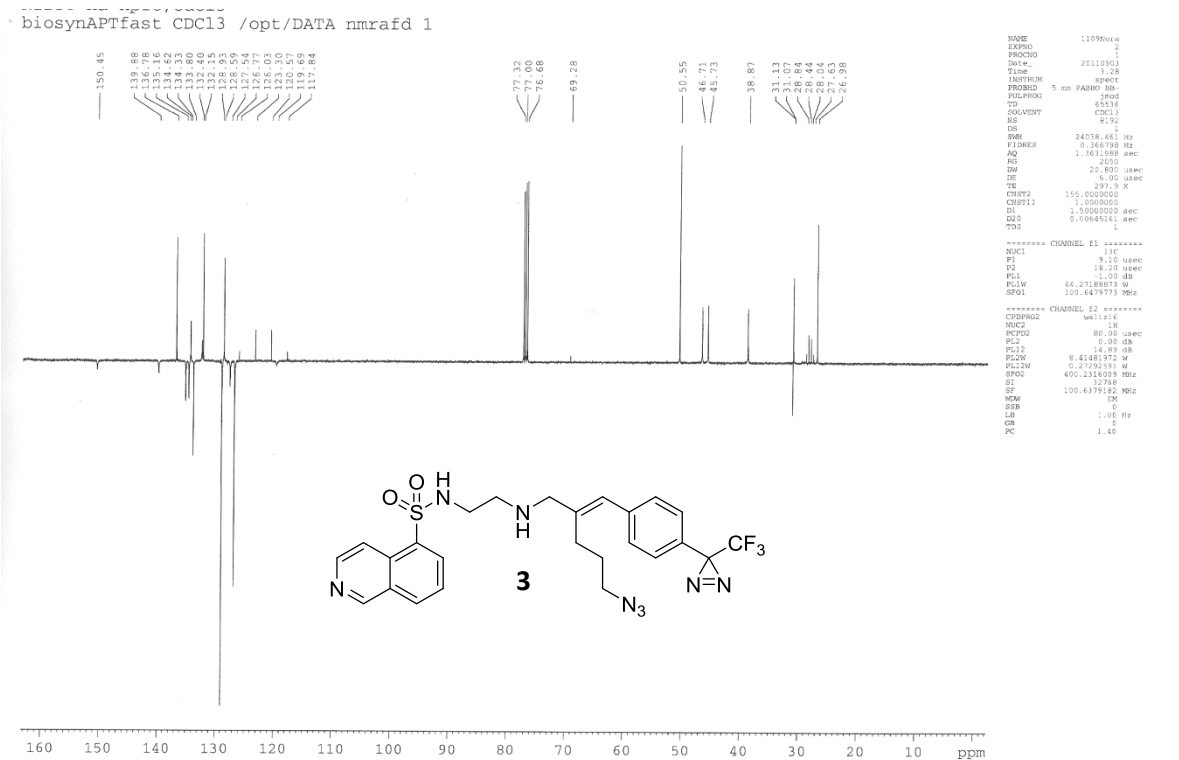

**Fig.S14:**  $^{13}\text{C}$  NMR (101 MHz,  $\text{CDCl}_3$ ) for (*E*)-*N*-(2-((5-azido-2-(4-(3-(trifluoromethyl)-3*H*-diazirin-3-yl)benzylidene)pentyl)amino)ethyl)isoquinoline-5-sulfonamide (**3**).

biosynHfast CDCl<sub>3</sub> /opt/DATA nmrafd 7

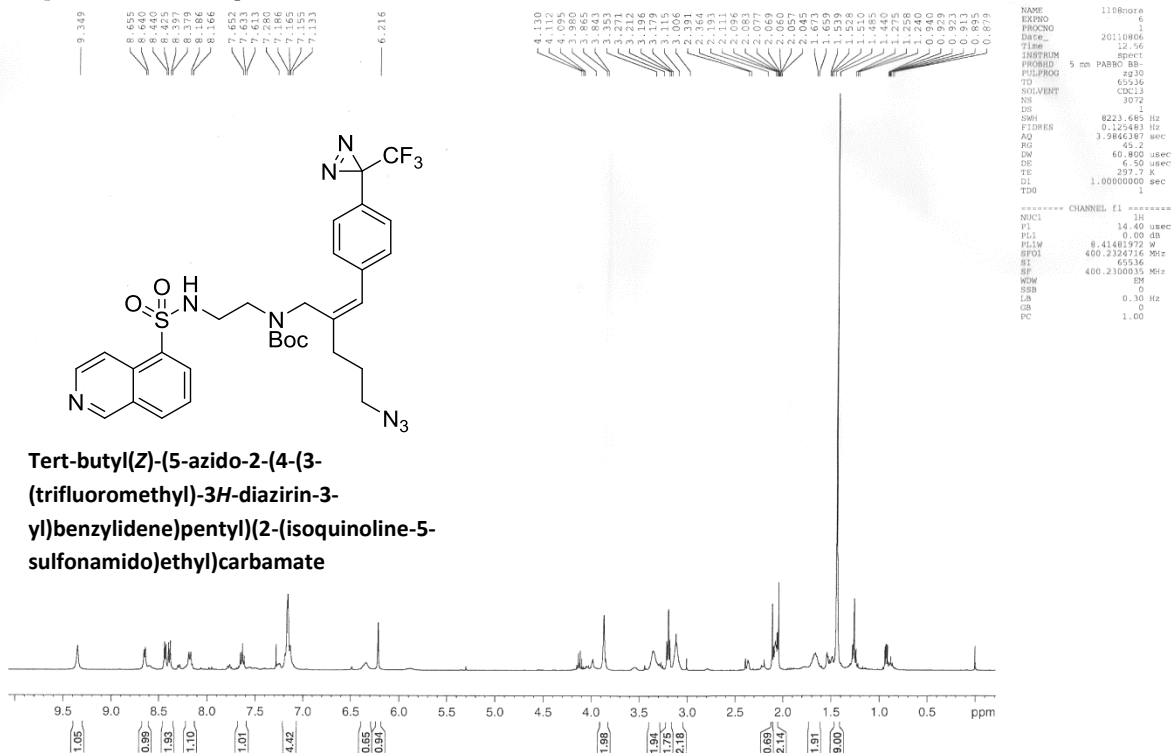

**Fig.S15:** <sup>1</sup>H NMR (400 MHz, CDCl<sub>3</sub>, Me<sub>4</sub>Si) for tert-butyl(Z)-(5-azido-2-(4-(3-(trifluoromethyl)-3H-diazirin-3-yl)benzylidene)pentyl)(2-(isoquinoline-5-sulfonamido)ethyl)-carbamate.

biosynAPTfast CDCl<sub>3</sub> /opt/DATA nmrafd 7

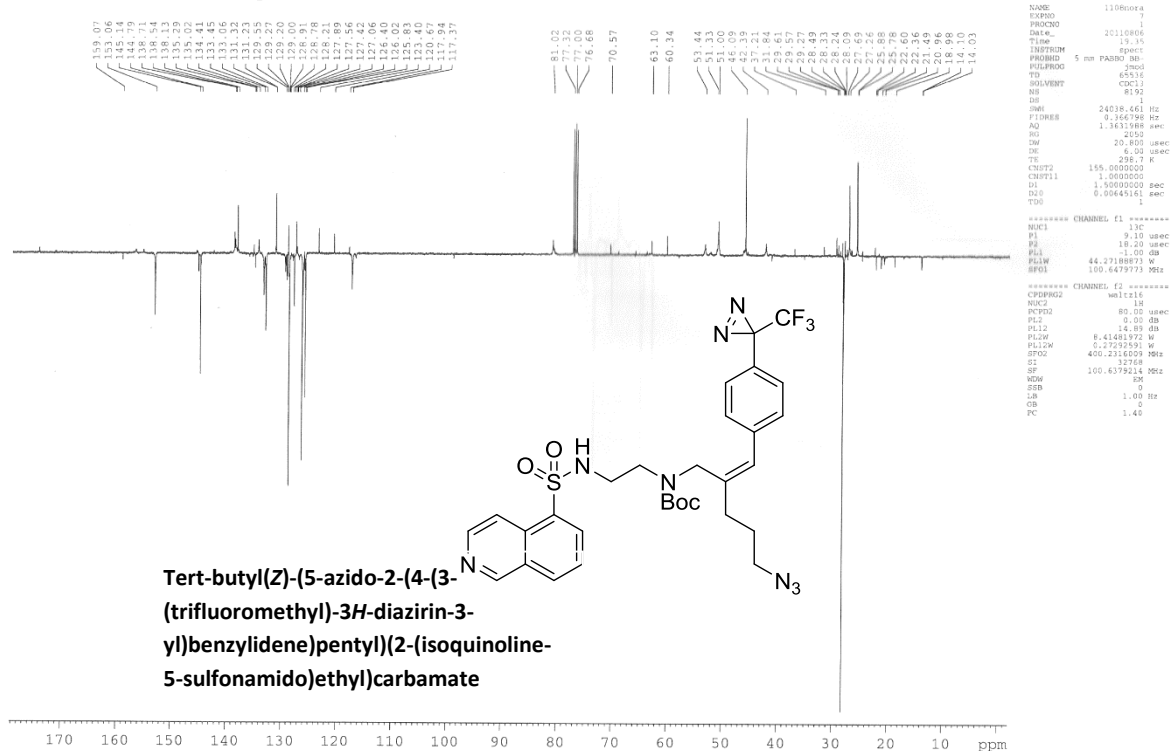

**Fig.S16:** <sup>13</sup>C NMR (101 MHz, CDCl<sub>3</sub>) for tert-butyl(Z)-(5-azido-2-(4-(3-(trifluoromethyl)-3H-diazirin-3-yl)benzylidene)pentyl)(2-(isoquinoline-5-sulfonamido)ethyl)-carbamate.

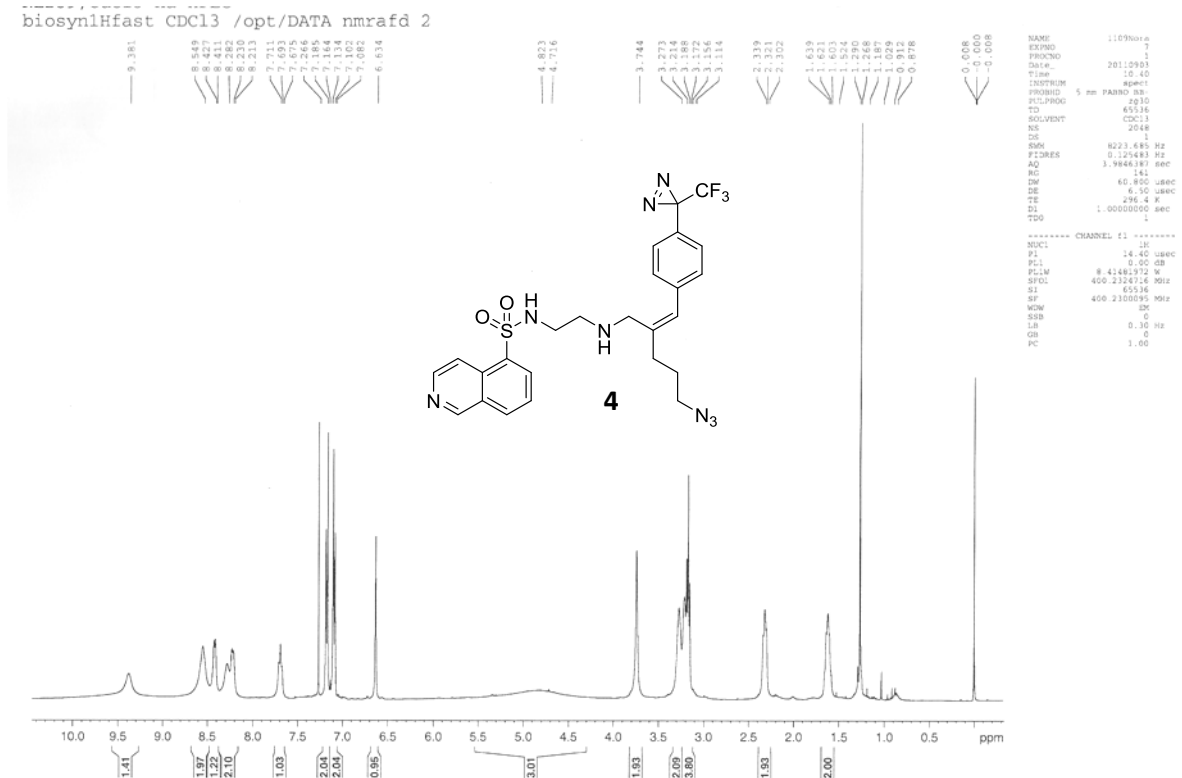

**Fig.S17:** <sup>1</sup>H NMR (400 MHz, CDCl<sub>3</sub>, Me<sub>4</sub>Si) for (Z)-N-(2-((5-azido-2-(4-(3-(trifluoromethyl)-3H-diazirin-3-yl)benzylidene)pentyl)amino)ethyl)isoquinoline-5-sulfonamide (**4**).

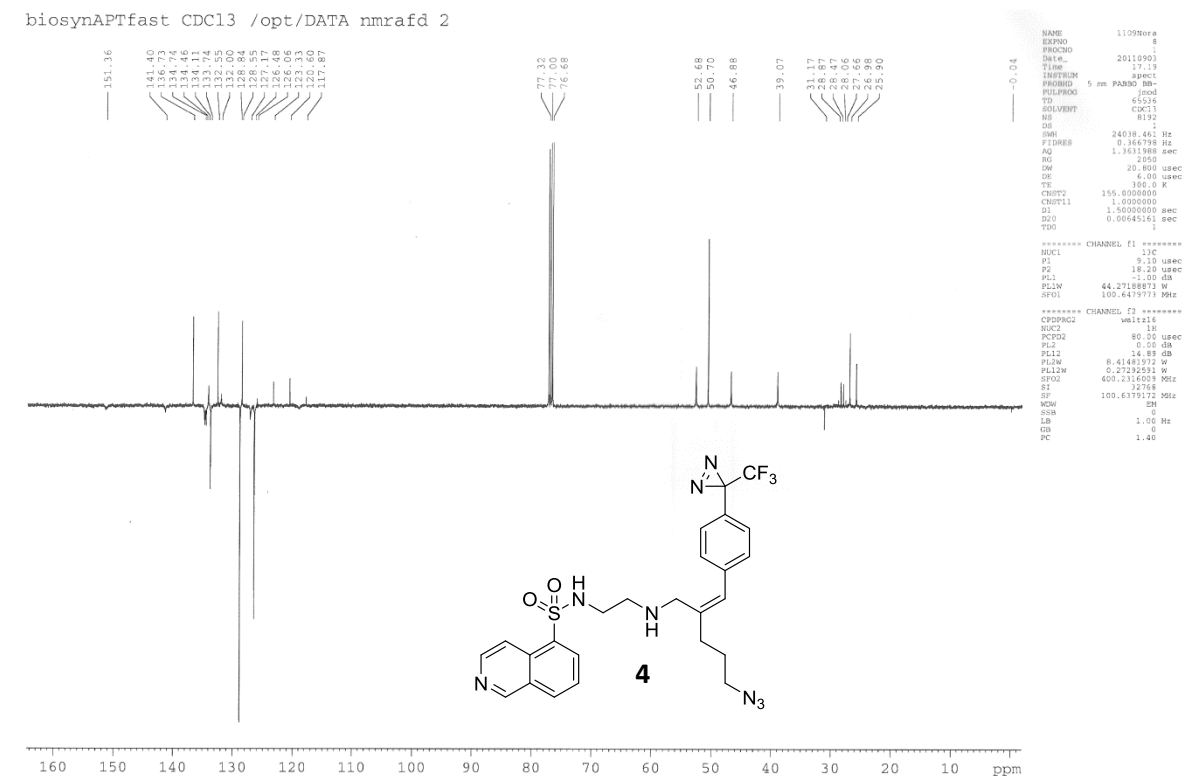

**Fig.S18:** <sup>13</sup>C NMR (101 MHz, CDCl<sub>3</sub>) for (Z)-N-(2-((5-azido-2-(4-(3-(trifluoromethyl)-3H-diazirin-3-yl)benzylidene)pentyl)amino)ethyl)isoquinoline-5-sulfonamide (**4**).

h1 CDCl3 /opt/topspin nmrafd 50

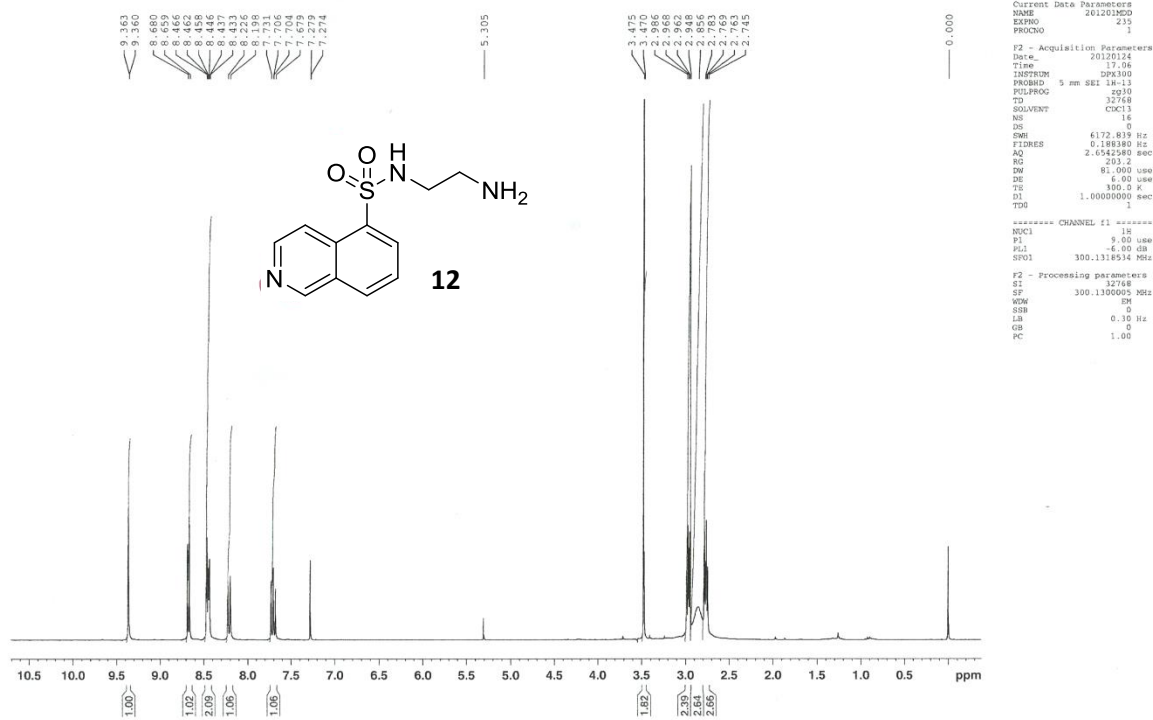

Fig.S19:  $^1\text{H}$  NMR (400 MHz,  $\text{CDCl}_3$ ,  $\text{Me}_4\text{Si}$ ) for (*N*-(2-aminoethyl)isoquinoline-5-sulfonamide (**12**).

c13-APT CDCl3 /opt/topspin nmrafd 50

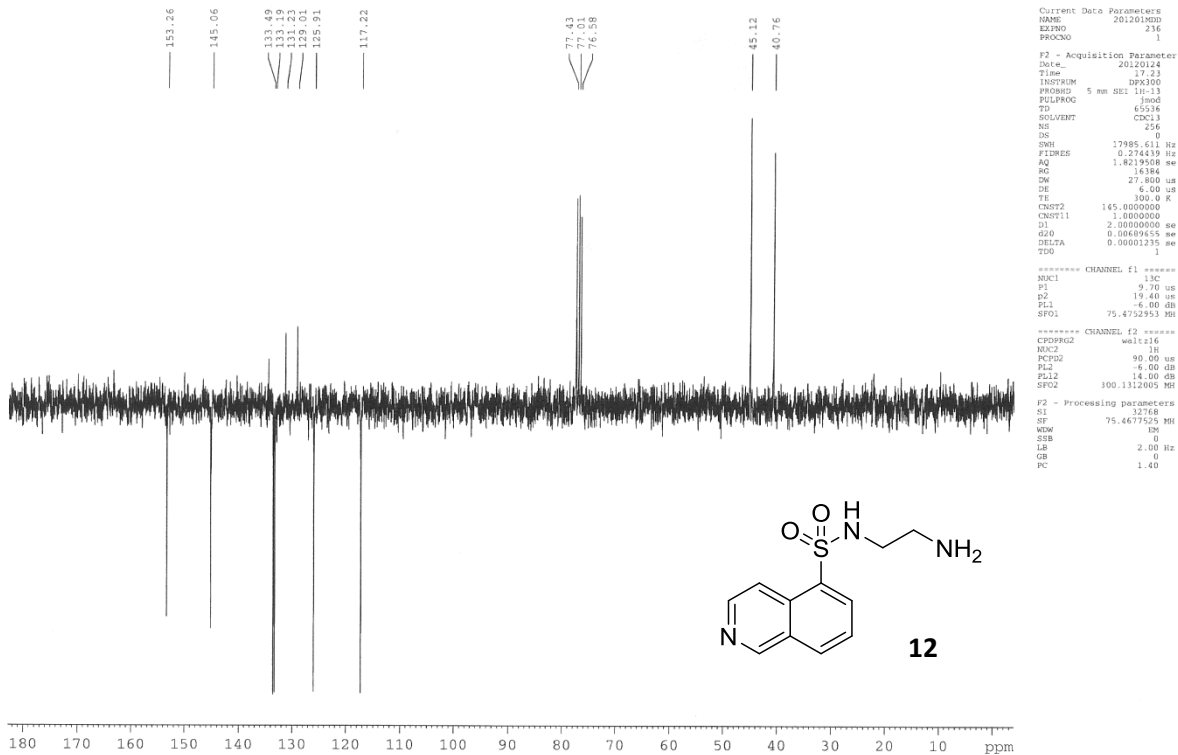

Fig.S20:  $^{13}\text{C}$  NMR (101 MHz,  $\text{CDCl}_3$ ) for (*N*-(2-aminoethyl)isoquinoline-5-sulfonamide (**12**).

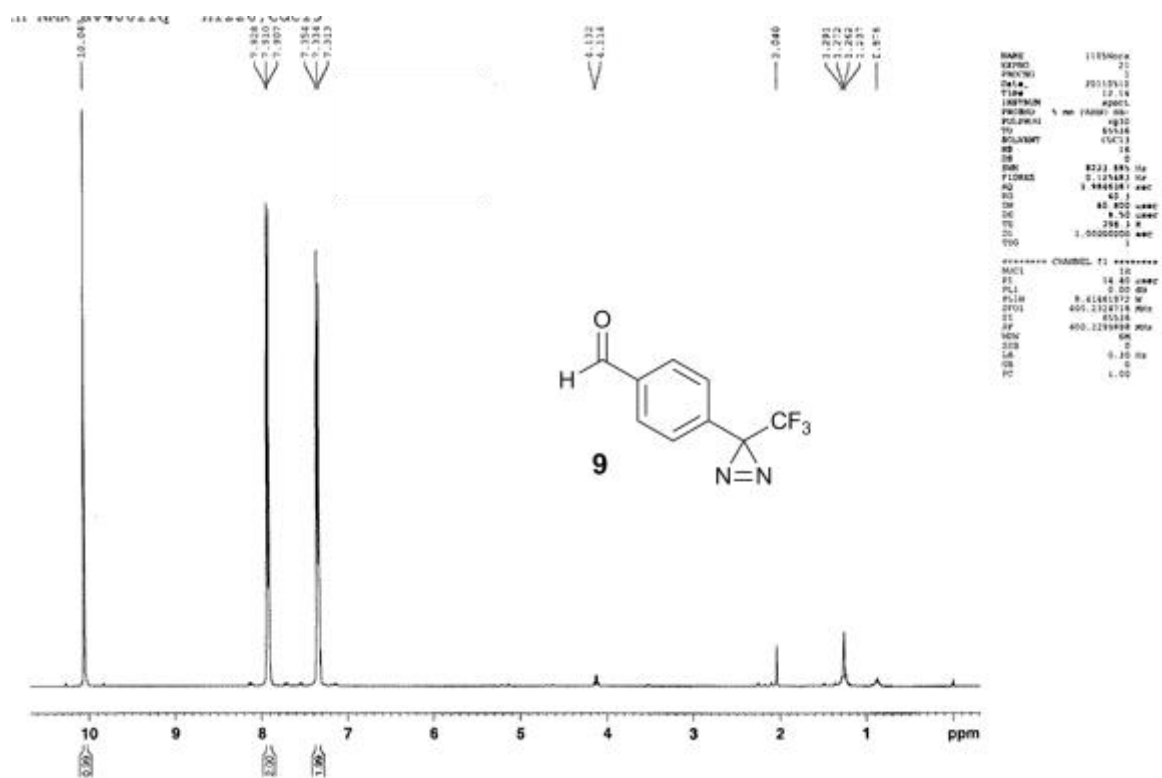

**Fig.S21:**  $^1\text{H}$  NMR (400 MHz,  $\text{CDCl}_3$ ,  $\text{Me}_4\text{Si}$ ) for 4-(3-(Trifluoromethyl)-3H-diazirin-3-yl)benzaldehyde (9).

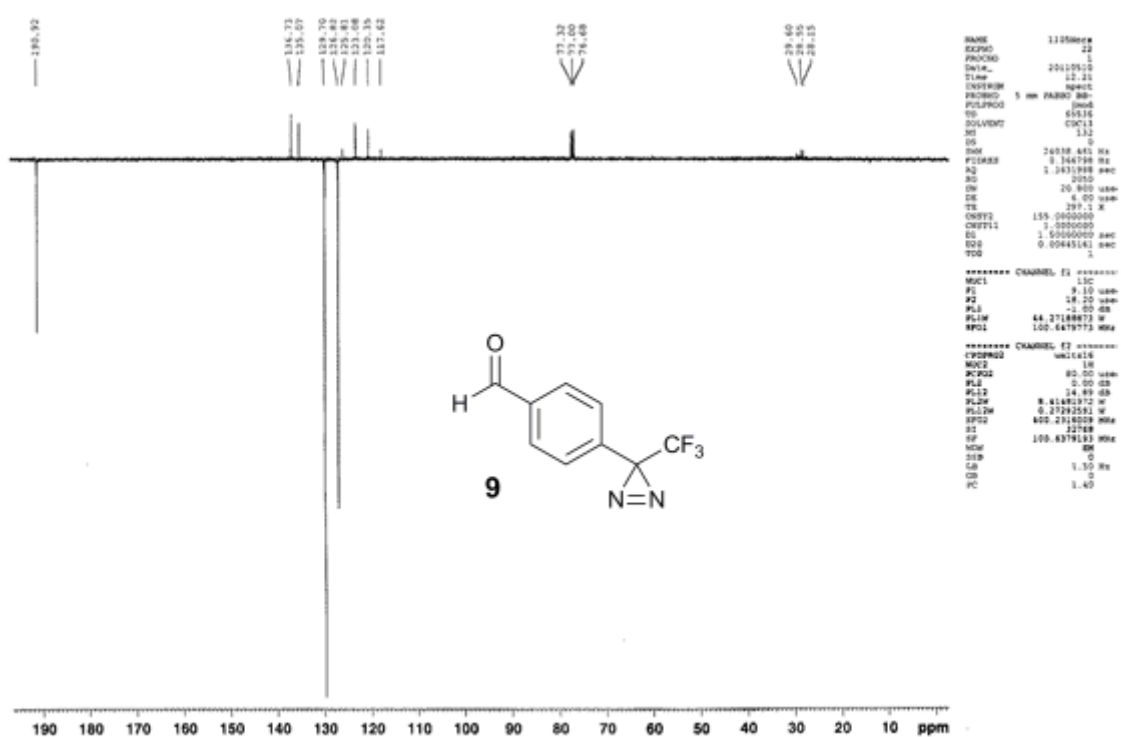

**Fig.S22:**  $^{13}\text{C}$  NMR (101 MHz,  $\text{CDCl}_3$ ) for 4-(3-(Trifluoromethyl)-3H-diazirin-3-yl)benzaldehyde (9).
